# Supplementary material for: Alternative Approaches for Uncovering Phytoplasma Biodiversity and Vector Associations
Source: Preprints.org preprint supplement (doi:10.20944/preprints202206.0122.v1), 2022-06-08
Supplement: Supplementary file 1 [file supplementary]

## Sheet: Table A1
Table A1. List of 35 samples of leafhoppers analyzed in this study. All taxa belong to subfamily Deltocephalinae (Hemiptera, Cicadellidae). Each sample represents one specimen of one species (columns B-F) collected in an independent collecting event (columns G-O).
code sample	Subfamily	tribe	subtribe	genus	species	Date	collector	collection method	Country	coodY	CooX		altitude	location	AHE1	AHE1 length	AHE-BLAST	AHE-BLAST hit	AHE-identity(coverage)	iPhycl	AHE1 iPhycl-Ca. Phytoplasma ass.	AHE1 iPhycl-16S group/subgroup classification	RFLP unique restriction enzymes	AHE2 length	AHE1-AHE2	AHE2 iPhycl-Ca. Phytoplasma ass.	AHE2 iPhycl-16S group/subgroup classification	CAT-AHE	CATcons-AHE	qPCR	qPCR-Cq	CAT-qPCR	date analyses	nestedPCR	date exp	CAT-Sanger Sequencing	Sequence length	primers	SS-BLAST	SS-BLAST hit	SS-identity(coverage)	iPhycl	iPhycl-CaP	iPhycl-sub	AHEversusSS identity(coverage)	AHE-nested-qPCR	AHE-nested	Trim from iPhyC	BLAST
1CH	Deltocephalinae	Cicadulini		Rhopalopyx	elongata	12-Jun-2017	V. Trivellone	sweep net	Switzerland	46°10'07.4"N	8°51'44.9"E			Reviscái, Riserva Bolle di Magadino, Gordola, Ticino	full	1530	16SrVI-A Ca. P. trifolii	AB279597	99.41 (100)	proposed 16Sr VI-L	The query 16S rDNA sequence shares 99.4% similarity with that of the ‘'Candidatus Phytoplasma trifolii' ’ reference strain (GenBank accession: AY390261). The phytoplasma under study is a ‘'Candidatus Phytoplasma trifolii' ’-related strain	The virtual RFLP pattern derived from the query 16S rDNA F2nR2 fragment is different from the reference patterns of all previously established 16Sr groups/subgroups. The most similar is the reference pattern of the 16Sr group VI, subgroup D (GenBank accession: X83431), with a similarity coefficient of 0.96, which is less than or equal to 0.97. This strain may represent a new subgroup within the 1…	AluI sliglhy different from AF190225	1530	identical			full	phy	pos	22.082	phy	16/5/2022	pos	44697	phy-partial	690	F1								AHE=qPCR=nested	58bp dif, 5 gaps
2TH	Deltocephalinae	Athysanini		n.gen.T1	n.sp.	5/12-Dec-2006	Patikom Tumtip	Malaise	Thailand	17°27'54.1"N	101°21'18.1"E		700	Loei Phu Ruea NP Old road to the park	full	1529	16Sr VI Brinjal little leaf phytoplasma	MW273763	97.25 (100)	XXXII-D related new group	The query 16S rDNA sequence shares less than 97.5% similarity with that of any previously recognized ‘Candidatus Phytoplasma’ species reference strain. The most closely related phytoplasma is ‘'Candidatus Phytoplasma trifolii' ’ (GenBank accession: AY390261), whose 16S rDNA sequence shares 97.2531066056246% similarity with the query. According to IRPCM (2004), the phytoplasma under study may repr…	The virtual RFLP pattern derived from the query 16S rDNA F2nR2 fragment is different from the reference patterns of all previously established 16Sr groups/subgroups. The most similar is the reference pattern of the 16Sr group XXXII, subgroup D (GenBank accession: MW138004), with a similarity coefficient of 0.77, which is less than 0.85. This strain may represent a new group. We recommend you comp…		1529	identical			full	phy	pos	25.059	phy	16/5/2022	pos	44697	phy	1381	F1/R1 and F2/R2	Alaska potato witches'-broom phytoplasma	KR072667.1	96.82(98)		b6 The query 16S rDNA sequence shares less than 97.5% similarity with that of any previously recognized ‘Candidatus Phytoplasma’ species reference strain. The most closely related phytoplasma is ‘'Candidatus Phytoplasma trifolii' ’ (GenBank accession: AY390261), whose 16S rDNA sequence shares 96.8795355587808% similarity with the query. According to IRPCM (2004), the phytoplasma under study may r…	b6 --The virtual RFLP pattern derived from the query 16S rDNA F2nR2 fragment is different from the reference patterns of all previously established 16Sr groups/subgroups. The most similar is the reference pattern of the 16Sr group XXXII, subgroup D (GenBank accession: MW138004), with a similarity coefficient of 0.77, which is less than 0.85. This strain may represent a new group. We recommend you…		AHE=qPCR=nested	identical	GAAACGACTGCTAAGACTGGATAGGAAACAGAAAGGCATCTTTTTGTTTTTAAAAGACCTTCTTCGGAGGGTATGCTTAAAGAGGGGCTTGCGCCACATTAGTTAGTTGGTAGGGTAAAGGCCTACCAAGACTATGATGTGTAGCCGGACTGAGAGGTTGAACGGCCACATTGGGACTGAGACACGGCCCAAACTCCTACGGGAGGCAGCAGTAGGGAATTTTCGGCAATGGAGGAAACTCTGACCGAGCAACGCCGCGTGAATGATGAAGTATTTCGGTATGTAAAGTTCTTTTATTAAAGAAGAAAAAATAGTGGAAAAACTATCTTGACGTTATTTAATGAATAAGCCCCGGCTAACTATGTGCCAGCAGCCGCGGTAAGACATAGGGGGCGAGCG…
3AU	Deltocephalinae	Opsiini	Opsiina	Orosius	argentatus	23-Apr/4-May-2003	M.E. Irwin, F.D. Parker	Malaise	Australia	22°28'24.0"S	118°32'36.0"E		668	Western Australia Karjini Nat'l Park, Dale Gorge Road	full	1528	16SrXXXVII Candidatus Phytoplasma stylosanthis	MT431551.1	100(89)	16SrXXXVII-A	The query 16S rDNA sequence shares less than 97.5% similarity with that of any previously recognized ‘Candidatus Phytoplasma’ species reference strain. The most closely related phytoplasma is ‘'Candidatus Phytoplasma trifolii' ’ (GenBank accession: AY390261), whose 16S rDNA sequence shares 97.3167539267016% similarity with the query. According to IRPCM (2004), the phytoplasma under study may repr…	The virtual RFLP pattern derived from the query 16S rDNA F2nR2 fragment is identical (similarity coefficient 1.00) to the reference pattern of 16Sr group XXXVII, subgroup A (GenBank accession: AJ289192). The phytoplasma under study is a member of 16SrXXXVII-A		1528	identical			full	phy	pos	23.231	phy	44260	pos	44697	phy-partial	784	F2								AHE=qPCR=nested	18bp dif, 1 gap
4CH	Deltocephalinae	Athysanini		Euscelidius	variegatus	25-Jun-2015	V. Trivellone	sweep net	Switzerland	46°46'10.6"N	6°33'21.4"E			Canton Vaud	full	1527	16SrI-B	AY265212.1	99.80(100)	16SrI-F	99.4 Ca. P. asteris	The virtual RFLP pattern derived from the query 16S rDNA F2nR2 fragment is identical (similarity coefficient 1.00) to the reference pattern of 16Sr group I, subgroup F (GenBank accession: AY265211). The phytoplasma under study is a member of 16SrI-F .		1527	identical			full	phy	pos	26.411	phy	16/5/2022	pos	44692	phy	1368	F1/R1	16SrI-F				J3 The query 16S rDNA sequence shares 99.3% similarity with that of the ‘'Candidatus Phytoplasma asteris' ’ reference strain (GenBank accession: M30790). The phytoplasma under study is a ‘'Candidatus Phytoplasma asteris' ’-related strain.	J3 --The virtual RFLP pattern derived from the query 16S rDNA F2nR2 fragment is identical (similarity coefficient 1.00) to the reference pattern of 16Sr group I, subgroup F (GenBank accession: AY265211). The phytoplasma under study is a member of 16SrI-F .	99.71(89)	AHE=qPCR=nested	3bp dif, 1 gap
5MX	Deltocephalinae	Scaphytopiini		Scaphytopius (Cloanthanus)	aequus	25-Oct-2001	C.H. Dietrich	sweep net	Mexico	19°59'00.0"N	97°11'00.0"W		200	Veracruz, 6km NE 6 km NE Tlapacoyan, Cascada Encantada	full	1527	16SrI-B	EU215425.2	99.8(99)	16SrI-B variant	The query 16S rDNA sequence shares 99.5% similarity with that of the ‘'Candidatus Phytoplasma asteris' ’ reference strain (GenBank accession: M30790). The phytoplasma under study is a ‘'Candidatus Phytoplasma asteris' ’-related strain	The virtual RFLP pattern derived from the query 16S rDNA F2nR2 fragment is most similar to the reference pattern of the 16Sr group I, subgroup B (GenBank accession: AP006628), with a pattern similarity coefficient of 0.98. The phytoplasma under study is a variant of 16SrI-B		1527	identical			full	phy	pos	20.279	phy	16/5/2022	pos	44697	phy	1378	F1/R1 and F2/R2	16SrI-B	KX236147.1	99.93(99)		The query 16S rDNA sequence shares 99.7% similarity with that of the ‘'Candidatus Phytoplasma asteris' ’ reference strain (GenBank accession: M30790). The phytoplasma under study is a ‘'Candidatus Phytoplasma asteris' ’-related strain.	The virtual RFLP pattern derived from the query 16S rDNA F2nR2 fragment is identical (similarity coefficient 1.00) to the reference pattern of 16Sr group I, subgroup B (GenBank accession: AP006628). The phytoplasma under study is a member of 16SrI-B .		AHE=qPCR=nested	4bp dif, 2 gaps	AHE gave a variant, nested resulted in 100% 16SrIB
6MG	Deltocephalinae	Stenometopiini		gen.	sp.	04/12-Feb-2002			Madagascar	21°13'34.2"S	47°22'11.4"E		1110	Fianarantsoa Prov., Parc National Ranomafana, Vohiparara, at broken bridge	full	1525	16SrIV-C	MT293886.1	96.1(98)	XXIV A related new group	The query 16S rDNA sequence shares less than 97.5% similarity with that of any previously recognized ‘Candidatus Phytoplasma’ species reference strain. The most closely related phytoplasma is ‘Sorghum bunchy shoot phytoplasma ’ (GenBank accession: AF509322), whose 16S rDNA sequence shares 96.5156794425087% similarity with the query. According to IRPCM (2004), the phytoplasma under study may repre…	The virtual RFLP pattern derived from the query 16S rDNA F2nR2 fragment is different from the reference patterns of all previously established 16Sr groups/subgroups. The most similar is the reference pattern of the 16Sr group XXIV, subgroup A (GenBank accession: AF509322), with a similarity coefficient of 0.80, which is less than 0.85. This strain may represent a new group. We recommend you compa…	BfaI, BstUI, Hinfl, MseI, TaqI	1525	identical			full	phy	pos	27.204	phy	16/5/2022	pos-partial	44697	phy-partial	783	R1	phytoplasma							AHE=qPCR=nested	too many bp dif
7IL	Deltocephalinae	Opsiini		Neoaliturus	argillaceus	20-Jun-2020	G. Sinaiko	sweep net	Israel	31°59'33.1"N	34°48'45.6"E			Rishon Lezion	full	1525	16SrIX	MK454714.1	99.54(100)	IX-J related	The query 16S rDNA sequence shares 98.9% similarity with that of the ‘'Candidatus Phytoplasma phoenicium' ’ reference strain (GenBank accession: AF515636). The phytoplasma under study is a ‘'Candidatus Phytoplasma phoenicium' ’-related strain	The virtual RFLP pattern derived from the query 16S rDNA F2nR2 fragment is different from the reference patterns of all previously established 16Sr groups/subgroups. The most similar is the reference pattern of the 16Sr group IX, subgroup J (GenBank accession: KY986922), with a similarity coefficient of 0.97, which is less than or equal to 0.97. This strain may represent a new subgroup within the…		1525	identical			full	phy	pos	21.385	phy	16/5/2022	pos	44692	phy	1366	F1/R1	as AHE						99.78(88)	AHE=qPCR=nested	1bp dif, 1 gap
8AU	Deltocephalinae	Paralimnini	Paralimnina	Micrelloides	n.sp.	7-Dec-2011	K. Hill, D. Marshall	Hg-vapor light	Australia	18°09'43.2"S	140°51'18.0"E			Queensland, ~60 km S Normanton at Flinders River on Burke Dev Rd. K. Hill & D. Marshall, MV light	full	1524	16SrXV-C	MW281490	98.87 (98)	proposed 16Sr XV-D	97.6% similarity with that of the ‘'Candidatus Phytoplasma brasiliense' ’ reference strain (GenBank accession: AF147708). The phytoplasma under study is a ‘'Candidatus Phytoplasma brasiliense' ’-related strain	The virtual RFLP pattern derived from the query 16S rDNA F2nR2 fragment is different from the reference patterns of all previously established 16Sr groups/subgroups. The most similar is the reference pattern of the 16Sr group XV, subgroup C (GenBank accession: MW281490), with a similarity coefficient of 0.89, which is less than or equal to 0.97. This strain may represent a new subgroup within the…	BfaI	1524	identical			full	phy	pos	25.249	phy	16/5/2022	pos	44697	phy	1317	F2/R2 and F2/R2								AHE=qPCR=nested	106 bp differences
9TW	Deltocephalinae	Opsiini	Opsiina	Alishania	formosana	15-Jun-2004	C.H. Dietrich	sweep net	Taiwan	24°07'12.0"N	121°14'22.0"E		2700	Nantou Yuanfeng, Rt.14 km	full	1523	16SrIV-C	X80117.1	96(100)	XXIV A related new group	The query 16S rDNA sequence shares less than 97.5% similarity with that of any previously recognized ‘Candidatus Phytoplasma’ species reference strain. The most closely related phytoplasma is ‘Sorghum bunchy shoot phytoplasma ’ (GenBank accession: AF509322), whose 16S rDNA sequence shares 96.4459930313589% similarity with the query. According to IRPCM (2004), the phytoplasma under study may repre…	The virtual RFLP pattern derived from the query 16S rDNA F2nR2 fragment is different from the reference patterns of all previously established 16Sr groups/subgroups. The most similar is the reference pattern of the 16Sr group XXIV, subgroup A (GenBank accession: AF509322), with a similarity coefficient of 0.81, which is less than 0.85. This strain may represent a new group. We recommend you compa…	BfaI, BstUI, HaeIII, Hinfl, MseI, TaqI	1523	identical	1 The query 16S rDNA sequence shares less than 97.5% similarity with that of any previously recognized ‘Candidatus Phytoplasma’ species reference strain. The most closely related phytoplasma is ‘Sorghum bunchy shoot phytoplasma ’ (GenBank accession: AF509322), whose 16S rDNA sequence shares 96.5083798882682% similarity with the query. According to IRPCM (2004), the phytoplasma under study may rep…	1 --The virtual RFLP pattern derived from the query 16S rDNA F2nR2 fragment is different from the reference patterns of all previously established 16Sr groups/subgroups. The most similar is the reference pattern of the 16Sr group XXIV, subgroup A (GenBank accession: AF509322), with a similarity coefficient of 0.81, which is less than 0.85. This strain may represent a new group. We recommend you c…	full	phy	pos	25.851	phy	16/5/2022	pos	44692	phy	1363	F1/R1 and F2/R2	as AHE						99.85(89)	AHE=qPCR=nested	1 gap, 1 bp dif which disappear if you trim F2 R2	GAAACAGTTGCTAAGGCTGGATAGGAAACAGAAAGGCATCTTTTTGTTTTTAAAAGACCTTCTTCGGAGGGTATGCTTAAAGAGGGGCTTGCGCCACATTAGTTAGTTGGTAGGGTAAAGGCCTACCAAGACGATGATGTGTAGCTGGACTGAGAGGTTGAACAGCCACATTGGGACTGAGACACGGCCCAAACTCCTACGGGAGGCAGCAGTAGGGAATTTTCGGCAATGGAGGAAACTCTGACCGAGCAACGCCGCGTGAACGATGAAGTATTTCGATACGTAAAGTTCTTTTATTGAGGAAGAAAAAATAGTGGAAAAACTATCTTGACGTTATTCAATGAATAAGCCCCGGCTAACTATGTGCCAGCAGCCGCGGTAATACATAGGGGGCGAGCG…
10US	Deltocephalinae	Paralimnini		Diplocolenus (Verdanus)	evansi	21-Jul-2020	C.H. Dietrich	sweep net	USA	40°40'58.8"N	105°46'12.0"W		2700	Larimer Co., Poudre Canyon	full	1522	16SrXI-C	HQ589192	99.93(98)	16SrXI-C	The query 16S rDNA sequence shares 97.9% similarity with that of the ‘'Candidatus Phytoplasma cynodontis' ’ reference strain (GenBank accession: AJ550984). The phytoplasma under study is a ‘'Candidatus Phytoplasma cynodontis' ’-related strain.	The virtual RFLP pattern derived from the query 16S rDNA F2nR2 fragment is identical (similarity coefficient 1.00) to the reference pattern of 16Sr group XI, subgroup C (GenBank accession: X76429). The phytoplasma under study is a member of 16SrXI-C .		1522	identical			full	phy	pos	20.571	phy	16/5/2022	pos	44692	phy	1367	F1/R1 and F2/R2	as AHE						99.78(100)	AHE=qPCR=nested	2bp dif
11FR	Deltocephalinae	Fieberiellini		Synophropsis	lauri	8-Aug-2018			France	43°51'08.3"N	1°49'26.9"E			Montans	full	1522	16SrIII J or 16SrIIIU	KY778013.1	99.60(98)	16SrIII-U variant	The query 16S rDNA sequence shares 99.1% similarity with that of the ‘'Candidatus Phytoplasma pruni' rrnA ’ reference strain (GenBank accession: JQ044393). The phytoplasma under study is a ‘'Candidatus Phytoplasma pruni' rrnA ’-related strain.	The virtual RFLP pattern derived from the query 16S rDNA F2nR2 fragment is most similar to the reference pattern of the 16Sr group III, subgroup U (GenBank accession: HM589213), with a pattern similarity coefficient of 0.98. The phytoplasma under study is a variant of 16SrIII-U .		1521	identical			full	phy	pos	28.289	phy	16/5/2022	pos	44697	oB-partial	812									AHE=qPCR<>nested
12ZM	Deltocephalinae	Selenocephalini	Ianeirina	Abimwa	sp.	5-Nov-2007	James N. Zahniser	Hg-vapor light	Zambia	11°34'28.2"S	24°23'40.1"E		1445	Northwestern Prov., ~15 km N Mwinilunga, Lwakera National Forest	full	1522	16SrIII J or 16SrIIIU	KY778013.1	99.67(98)	16SrIII-U variant	The query 16S rDNA sequence shares 99.0% similarity with that of the ‘'Candidatus Phytoplasma pruni' rrnA ’ reference strain (GenBank accession: JQ044393). The phytoplasma under study is a ‘'Candidatus Phytoplasma pruni' rrnA ’-related strain	The virtual RFLP pattern derived from the query 16S rDNA F2nR2 fragment is most similar to the reference pattern of the 16Sr group III, subgroup U (GenBank accession: HM589213), with a pattern similarity coefficient of 0.98. The phytoplasma under study is a variant of 16SrIII-U .	MseI	1522	identical			full	phy	pos	27.652	phy	16/5/2022	pos	44697	oB	1386	F1/R1	Bacillus sp.	MT673819.1						AHE=qPCR<>nested
13BR	Deltocephalinae	Macrostelini		Dalbulus	maidis	10-May-2011	Cavichioli, Gonçalves, D.M. Takiya	light trap	Brazil	7°19'46.0"S	71°50'46.0"W		169	State of Amazonas, Ipixuna, Rio Liberdade, Com. Santa Catarina	full	1378	16SrI-B	CP035949.1	100(100)	I-K related strain new subgroup	The query 16S rDNA sequence shares 99.9% similarity with that of the ‘'Candidatus Phytoplasma asteris' ’ reference strain (GenBank accession: M30790). The phytoplasma under study is a ‘'Candidatus Phytoplasma asteris' ’-related strain	The virtual RFLP pattern derived from the query 16S rDNA F2nR2 fragment is different from the reference patterns of all previously established 16Sr groups/subgroups. The most similar is the reference pattern of the 16Sr group I, subgroup K (GenBank accession: U96616), with a similarity coefficient of 0.92, which is less than or equal to 0.97. This strain may represent a new subgroup within the 16…	AluI, BfaI, BstUI, DraI,HaeIII,HpaII, KpnI	1395	identical a little bit onger			full	phy	pos	23.748	phy	44260	pos	44697	phy	1381	F1/R1 and F2/R2	16SrI-B	KX236147.1	99.93(99)		The query 16S rDNA sequence shares 99.6% similarity with that of the ‘'Candidatus Phytoplasma asteris' ’ reference strain (GenBank accession: M30790). The phytoplasma under study is a ‘'Candidatus Phytoplasma asteris' ’-related strain.	a5 --The virtual RFLP pattern derived from the query 16S rDNA F2nR2 fragment is different from the reference patterns of all previously established 16Sr groups/subgroups. The most similar is the reference pattern of the 16Sr group I, subgroup K (GenBank accession: U96616), with a similarity coefficient of 0.92, which is less than or equal to 0.97. This strain may represent a new subgroup within t…		AHE=qPCR=nested	3bp diff, 2 gaps
14CN	Deltocephalinae	Athysanini		Nakaharanus	bimaculatus	2-May-2014	C.H. Dietrich	sweep net	China	26°36'03.6"N	106°41'24.0"E			Guizhou Qianlingshan Park	full	1522	16SrIII J or 16SrIIIU	KY778013.1	99.67 (98)	16SrIII-U variant	The query 16S rDNA sequence shares 99.0% similarity with that of the ‘'Candidatus Phytoplasma pruni' rrnA ’ reference strain (GenBank accession: JQ044393). The phytoplasma under study is a ‘'Candidatus Phytoplasma pruni' rrnA ’-related strain	The virtual RFLP pattern derived from the query 16S rDNA F2nR2 fragment is most similar to the reference pattern of the 16Sr group III, subgroup U (GenBank accession: HM589213), with a pattern similarity coefficient of 0.98. The phytoplasma under study is a variant of 16SrIII-U	MseI	1522	identical			full	phy	pos	31.209	oB	16/5/2022	pos	44697	oB-partial	795	R1								AHE<>qPCR=nested
15CA	Deltocephalinae	Limotettigini		Limotettix (Neodrylix)	urnura	29-Jul-1989	K.G.A. Hamilton	sweep net	Canada	45°59'10.7"N	81°56'16.8"W			Ontario, Little Current	full	1521	16SrXI-E Ca.P. cirsii	KR869146	98.88(99)	proposed 16SrXI-G	The query 16S rDNA sequence shares 98.9% similarity with that of the ‘'Candidatus Phytoplasma cirsii' ’ reference strain (GenBank accession: KR869146). The phytoplasma under study is a ‘'Candidatus Phytoplasma cirsii' ’-related strain.	The virtual RFLP pattern derived from the query 16S rDNA F2nR2 fragment is different from the reference patterns of all previously established 16Sr groups/subgroups. The most similar is the reference pattern of the 16Sr group XI, subgroup E (GenBank accession: KR869146), with a similarity coefficient of 0.93, which is less than or equal to 0.97. This strain may represent a new subgroup within the…		1521	identical			full	phy	pos	29.257	phy	16/5/2022	pos	44697	oB-partial	789	R1								AHE=qPCR<>nested
16FR	Deltocephalinae	Chiasmini		Doratura (Doraturina)	homophyla	8-Aug-2018			France	43°51'08.3"N	1°49'26.9"E			Montans	part	1339	16SrI-B	CP035949.1	99.93(100)	more likely 16SrI-B	The query 16S rDNA sequence shares 99.8% similarity with that of the ‘'Candidatus Phytoplasma asteris' ’ reference strain (GenBank accession: M30790). The phytoplasma under study is a ‘'Candidatus Phytoplasma asteris' ’-related strain.	the run does not work, but it works if we copy and paste the first 25 nuclotide of F2 segment that is missing here	the run does not work	1527	identical a little bit onger			full	phy	pos	29.72	phy	16/5/2022	failed		oB-partial										AHE=qPCR
17MN	Deltocephalinae	Macrostelini		Macrosteles	guttatus	23-Jul-2005			Mongolia	49°15'42.1"N	99°52'56.7"E		1618	Hovsgol Aimag, Tumurbulag Soum, Bugcei (Bugceiin) Gol, 45.5 km SW of Moron	part	1260	16SrI-B	MK992774.1	100(100)	more likely 16SrI-B	The query 16S rDNA sequence shares 99.9% similarity with that of the ‘'Candidatus Phytoplasma asteris' ’ reference strain (GenBank accession: M30790). The phytoplasma under study is a ‘'Candidatus Phytoplasma asteris' ’-related strain.	the run does not work, but it works if we copy and paste the first 25 nuclotide of F2 segment that is missing here		1527	identical a little bit onger			full	phy	pos	26.208	phy	44260	pos	44692	phy	1383	F1/R1	16SrI-B						99.83(93)	AHE=qPCR=nested	3bp dif, 1 gap
18MN	Deltocephalinae	Paralimnini	Paralimnina	Adarrus	n.sp.	14/15-Jul-2005			Mongolia	50°18'07.0"N	101°55'43.3"E		1063	Hovsgol Erdenebulgan Uur (Uuriin) Gol 32.6 km NE of Erdenebulgan, 1012 Gelhaus Field Number 65 Way Pt	part	1235	16SrV-C	FN562932.1	99.6(100)	??	The query 16S rDNA sequence shares 99.7% similarity with that of the ‘'Candidatus Phytoplasma vitis' ’ reference strain (GenBank accession: AF176319). The phytoplasma under study is a ‘'Candidatus Phytoplasma vitis' ’-related strain	the run does not work		1235	identical		RUN with NEW SEQ: The query 16S rDNA sequence shares 98.0% similarity with that of the ‘'Candidatus Phytoplasma ziziphi' ’ reference strain (GenBank accession: AB052876). The phytoplasma under study is a ‘'Candidatus Phytoplasma ziziphi' ’-related strain.	full	phy	pos	32.74	oB	44260	pos	44697	oB	1397	F1/R1 and F2/R2	unculture bacterium	AB695842.1	99.06(98)	not phytoplasma origin				AHE<>qPCR=nested	too many bp dif
19CD	Deltocephalinae	Scaphoideini		n.gen.ZA5	n.sp.1	5-Agu-2008	Braet + Sharkey		Republic of Congo	3°16'11.8"S	15°28'16.0"E		340	Dept. Pool Iboubikro site, MT #6 Lesio-Loun Wildlife Reserve	part	1235	16SrV-C	FN562932.1	99.6(100)	??	The query 16S rDNA sequence shares 99.7% similarity with that of the ‘'Candidatus Phytoplasma vitis' ’ reference strain (GenBank accession: AF176319). The phytoplasma under study is a ‘'Candidatus Phytoplasma vitis' ’-related strain	the run does not work		1235	identical		4 The query 16S rDNA sequence shares less than 97.5% similarity with that of any previously recognized ‘Candidatus Phytoplasma’ species reference strain. The most closely related phytoplasma is ‘'Candidatus Phytoplasma ziziphi' ’ (GenBank accession: AB052876), whose 16S rDNA sequence shares 96.980854197349% similarity with the query. According to IRPCM (2004), the phytoplasma under study may repr…	full	phy	pos	30.63	oB	16/5/2022	pos	44697	oB	1372	F1/R1 and F2/R2	unculture bacterium	KF494647.1	99.71(100)	not phytoplasma origin				AHE<>qPCR=nested
20PE	Deltocephalinae	Chiasmini		Exitianus	obscurinervis	23-Oct-2002	C.H. Dietrich	Hg-vapor light	Peru	9°23'27"S	75°59'49"W		650	Huanuco, 30 km S Tingo Maria	part	1179	16SrIII J or 16SrIIIU	KY778013.1	99.83(100)	-	-	the run does not work, but it works if we copy and paste the first 25 nuclotide of F2 segment that is missing here	-	1200	identical a little bit onger			full	phy	pos	31.827(1:5)	oB	44253	pos	44697	oB	1398	F1/R1	Bacillus megaterium	EU221339.1						AHE<>qPCR=nested
21ZA	Deltocephalinae	Chiasmini		Aconurella	prolixa	12-Dec-2004	J.N. Zahniser	sweep net	South Africa	33°38'52.9"S	19°38'18.1"E		314	W.Cape Prov., Leipzig Farm	part	807								1454	identical but longer			full	phy	pos	38.086	oB	44253	pos	44697	oB-partial	959	R1								AHE<>qPCR=nested
22CH	Deltocephalinae	Scaphoideini	-	Osbornellus	auronitens	13-Jul-2017	V. Trivellone	sweep net	Switzerland	45°51'17.8"N	8°55'37.8"E			Montalbano, Stabio, Ticino	full	764	ALY	AY197645.1						1521	identical but longer			full	phy	pos	31.271	oB	44253	pos	44697	oB	1287		uncultured bacterium	JF429125.1			not phytoplasma			AHE<>qPCR=nested
23CN	Deltocephalinae	Scaphoideini		Amimenus	mojiensis	12-Jul-2012	Wei Cong	vacuuming	China	33°58'52.8"N	108°09'49.8"E			Shaanxi, 8km ENE Chenhexiang	part	644								1524	identical but longer			full	phy	pos	27.795	phy	44253	pos	44697	phy	1374	F1/R1	16SrI	CP055264.1			c5 The query 16S rDNA sequence shares 99.7% similarity with that of the ‘'Candidatus Phytoplasma asteris' ’ reference strain (GenBank accession: M30790). The phytoplasma under study is a ‘'Candidatus Phytoplasma asteris' ’-related strain.	c5 --The virtual RFLP pattern derived from the query 16S rDNA F2nR2 fragment is identical (similarity coefficient 1.00) to the reference pattern of 16Sr group I, subgroup B (GenBank accession: AP006628). The phytoplasma under study is a member of 16SrI-B .		AHE=qPCR=nested	1 bp diff, 2 gaps
24FR	Deltocephalinae	Scaphoideini		Anoplotettix	putoni	29-Jun-2010	J.N. Zahniser	sweep net	France	44°15'15.1"N	5°04'27.2"E			Vaison la Romaine	part	586								1431	identical but longer			full	oB	pos	32.728	oB	44260	pos	44697	oB	1224	F1/R1	uncultured bacterium	KF071830.1						AHE=qPCR=nested			KF071830.1
25AU	Deltocephalinae	Deltocephalini		New Genus AU3	n.sp.2	13-Nov-2011	K. Hill, D. Marshall	Hg-vapor light	Australia	16°13'22.4"S	135°58'03.5"E			~65 km W Borrolooly on rd. to Roper Barr nr. Tawallah Station	part	533								910	identical but longer	The query 16S rDNA sequence shares less than 97.5% similarity with that of any previously recognized ‘Candidatus Phytoplasma’ species reference strain. The most closely related phytoplasma is ‘'Candidatus Phytoplasma oryzae' ’ (GenBank accession: AB052873), whose 16S rDNA sequence shares 95.1060358890702% similarity with the query. According to IRPCM (2004), the phytoplasma under study may repres…	too short to run	part	phy	pos	30.88	oB	44265	pos	44697	oB	1390	F1/R1 and F2/R2	Staphylococcus epidermidis	CP043796.1	99.78(100)					AHE<>qPCR=nested
26PH	Deltocephalinae	Scaphoideini		New Genus PH1	n.sp.	1-Apr-2012	T.A. Catanach	sweep net	Philippines	8°09'37.8"N	124°55'54.0"E		1885	Mindanao, Bukidnon, Mt. Kitanglad summit trail	part	423								1539	identical but longer and 1 bp differenrt and several N			full	phy	pos	29.881	phy	44260	pos	44697	oB	1397	F1/R1	Enterococcus italicus	MT994627.1						AHE=qPCR<>nested
27US	Deltocephalinae	Deltocephalini		Graminella	sonora	11/21-Sep-2014	M.E. Irwin, M.J. Sharkey	Malaise	US: Arizona	33°01'15.6"N	110°44'19.2"W		600	Pinal Co., Gila R. Mgmt. Area, The Shores, 5 km N Winkelman	part	359	16SI (378bp)	CP015149.1	99.74 (100)	na	na	na	na	1527	identical but longer			full	phy	pos	21.128	phy	44265	pos	44692	phy	1383	F1/R1 and F2/R2	16SrI-B				J1 The query 16S rDNA sequence shares 99.0% similarity with that of the ‘'Candidatus Phytoplasma asteris' ’ reference strain (GenBank accession: M30790). The phytoplasma under study is a ‘'Candidatus Phytoplasma asteris' ’-related strain.	J1 --The virtual RFLP pattern derived from the query 16S rDNA F2nR2 fragment is identical (similarity coefficient 1.00) to the reference pattern of 16Sr group I, subgroup B (GenBank accession: AP006628). The phytoplasma under study is a member of 16SrI-B		AHE=qPCR=nested	3bp dif, 2 gaps
28ZA	Deltocephalinae	Opsiini	Circuliferina	Neoaliturus	angulatus	17/22-Nov-1999	M.E. Irwin	Malaise	South Africa	33°33'46.2"S	24°21'07.2"E		620	Eastern Cape, Wolwekraal Farm, Bauaiaanskloof Mtns, 29 km S Steytlerville	part	356								0	identical but 0			na	neg	pos	30.999	oB	44260	pos	44697	oB	1288	F1/R1	uncultured bacterium	DQ532129.1						AHE=qPCR=nested
29CN	Deltocephalinae	Deltocephalini	-	Paramesodes	sp.	8-Sep-2015	C.H. Dietrich	sweep net	China	30°46'15.8"N	106°07'13.4"E		303	Suchuan Nanchong	part	303								870	identical but longer			part	phy	pos	28.273	phy	44260	pos	44697	phy-partial	873	R1	phytoplasma	CP055264.1						AHE=qPCR=nested
30MX	Deltocephalinae	Deltocephalini	-	Sanctanus	fasciatus	5-Sep-2017	Juan Cruzado	visual collection	Mexico	22°13'23.102"N	98°57'49.78"W		323	San Luis Potosi, Ciudad Valles, Reserva de la Biosfera Sierra del Abra Tanchipa, Los Pamer, Ejido Laguna del Mante	part	179								225	identical but longer			part	oB	pos	35.761	oB	44265	pos	44697	oB-partial	942	R1								AHE=qPCR=nested
31PH	Deltocephalinae	Scaphoideini	-	New_Genus_PH1	n.sp._2	3-Apr-2012	T. A. Catanach	Hg-vapor light	Philippines	8°09'54.6"N	124°55'57.6"E		1773	Mindanao, Bukidnon, Mt. Kitanglad summit trail	part	150								0				na	neg	pos	27.826	phy	44265	pos	44697	phy-partial	552	R1								AHE<>qPCR=nested
32BR	Deltocephalinae	Scaphoideini	-	Scaphoidula	dentata	25-Mar-2016	D.M. Takiya	sweep net	Brazil	3°21'36.0"N	61°25'55.2"W		100	Roraima, Reserva Maracá	part	150								621	identical but longer			part	oB	pos	33.05	oB	44260	pos	44697	oB-partial	1208	R1								AHE=qPCR=nested			HE577681.1
33US	Deltocephalinae	Limotettigini		Limotettix	truncatus	4-Jun-2020	C.H. Dietrich	vacuuming	USA	40°35'52.0"N	90°06'04.0"W			Double T Lake	part	81								0				na	neg	pos	32.6	oB	44257	pos	44697	oB	1381	F1/R1	Candidatus Simbiopectobacterium	MW936016.1						AHE=qPCR=nested
34AU	Deltocephalinae	Deltocephalini		Horouta	aristarche	22-Feb-2015	C.H. Dietrich	vacuuming	Australia	27°15'14.4"S	152°06'25.6"E		454	QLD, Crow's Nest N.P.	part	99								399	identical but longer			part	oB	pos	34.794	oB	44265	neg		oB-partial										AHE=qPCR=nested			AP022845.1
35BR	Deltocephalinae	Deltocephalini		Amplicephalus	maculellus	14-Mar-2015	C.H. Dietrich	vacuuming	Brazil	20°05'55.6"S	43°29'12.4"W		1280	MG, Santuario do Caraça, Lobo Guará Trl.	neg	na								0				na	neg	pos	28.718	phy	44260	pos	44697	oB	1277		uncultured bacterium	LR653907.1

## Sheet: Table A2
Table A2. Comparison of the sequences of phytoplasma 16Sr assembled using Anchored Hybrid Enrichment (AHE) and predicted using 2 methods: ABySS (AHE_sequence_ABySS) and HybPiper (AHE_sequence_HybPiper). SRA_accession_number= SRA (Sequence Read Archive) accession number for raw reads.
Code	Tribe	Species	SRA_accession_number	AHE_ABySS_tag	AHE_sequence_ABySS	Sequence_length (bp)	GenBank_best_hit	AHE_HibPiper_tag	AHE_sequence_HybPiper	Sequence_length (bp)	GenBank_best_hit	Length difference
1CH	Cicadulini	Rhopalopyx elongata	SRR17213128	phy	AAGAGTTTGATCCTGGCTCAGGATGAACGCTGGCGGCGTGCCTAATACATGCAAGTCGAACGAAAACCCCTTAAAAAGGTTTTAGTGGCGAACGGGTGAGTAACACGTAAGTAACCTGCCTTTAAGACGAGGATAACAACCGGAAACGGTTGCTAAGACTGGATAGGAAACAAAAAGGCATCTTTTTGTTTTTAAAAGACCTTCTTATGAAGGTATGCTTAAAGAGGGGCTTGCGCCACATTAGTTAGTTGGTAGAGTAAAAGCCTACCAAGACGATGATGTGTAGCTGGACTGAGAGGTTGAACAGCCACATTGGGACTGAGACACGGCCCAAACTCCTACGGGAGGCAGCAGTAGGGAATTTTCGGCAATGGAGGAAACTCTGACCGAGCAACGCCG…	1530	AB279597.1 Candidatus Phytoplasma trifolii 16S	phy	AAGAGTTTGATCCTGGCTCAGGATGAACGCTGGCGGCGTGCCTAATACATGCAAGTCGAACGAAAACCCCTTAAAAAGGTTTTAGTGGCGAACGGGTGAGTAACACGTAAGTAACCTGCCTTTAAGACGAGGATAACAACCGGAAACGGTTGCTAAGACTGGATAGGAAACAAAAAGGCATCTTTTTGTTTTTAAAAGACCTTCTTATGAAGGTATGCTTAAAGAGGGGCTTGCGCCACATTAGTTAGTTGGTAGAGTAAAAGCCTACCAAGACGATGATGTGTAGCTGGACTGAGAGGTTGAACAGCCACATTGGGACTGAGACACGGCCCAAACTCCTACGGGAGGCAGCAGTAGGGAATTTTCGGCAATGGAGGAAACTCTGACCGAGCAACGCCG…	1530	AB279597.1 Candidatus Phytoplasma trifolii 16S	0
2TH	Athysanini	n. gen. T1 n. sp.		phy	AAGAGTTTGATCCTGGCTCAGGATGAACGCTGGCGGCGTGCCTAATACATGCAAGTCGAACGGAGACCCCTTAAAAGGTCTTAGTGGCGAACGGGTGAGTAACACGTAAGTAACCTACCTTTAAGACGAGAATAACAACCGGAAACAGTTGCTAAGTCTGGATAGGAAACAGAAAGGCATCTTTTTGTTTTTAAAAGACCTTCTTCGGAGGGTATGCTTAAAGAGGGGCTTGCGCCACATTAGTTAGTTGGTAGGGTAAAGGCCTACCAAGACTATGATGTGTAGCCGGACTGAGAGGTTGAACGGCCACATTGGGACTGAGACACGGCCCAAACTCCTACGGGAGGCAGCAGTAGGGAATTTTCGGCAATGGAGGAAACTCTGACCGAGCAACGCCGC…	1529	MW273763.1 Brinjal little leaf phytoplasma 16S	phy	AAGAGTTTGATCCTGGCTCAGGATGAACGCTGGCGGCGTGCCTAATACATGCAAGTCGAACGGAGACCCCTTAAAAGGTCTTAGTGGCGAACGGGTGAGTAACACGTAAGTAACCTACCTTTAAGACGAGAATAACAACCGGAAACAGTTGCTAAGTCTGGATAGGAAACAGAAAGGCATCTTTTTGTTTTTAAAAGACCTTCTTCGGAGGGTATGCTTAAAGAGGGGCTTGCGCCACATTAGTTAGTTGGTAGGGTAAAGGCCTACCAAGACTATGATGTGTAGCCGGACTGAGAGGTTGAACGGCCACATTGGGACTGAGACACGGCCCAAACTCCTACGGGAGGCAGCAGTAGGGAATTTTCGGCAATGGAGGAAACTCTGACCGAGCAACGCCGC…	1529	MW273763.1 Brinjal little leaf phytoplasma 16S	0
3AU	Opsiini	Orosius argentatus	SRR17213184	phy	AAGAGTTTGATCCTGGCTCAGGATGAACGCTGGCGGCGTGCCTAATACATGCAAGTCGAACGAAAACCCCTCAAAAGGTTTTAGTGGCGAACGGGTGAGTAACACGTAAGTAACCTGCCTTTAAGACGAGAATAACAAATGGAAACATTTGCTAAGACTGGATAGGAAACAAAAAGGCATCTTTTTGTTTTTAAAAGACCTTTTAACAAAGGTATGCTTAAAGAGGGGCTTGCGCCACATTAGTTAGTTGGTAGGGTAAAGGCCTACCAAGACTATGATGTGTAGCTGGACTGAGAGGTTGAACAGCCACATTGGGACTGAGACACGGCCCAAACTCCTACGGGAGGCAGCAGTAGGGAATTTTCGGCAATGGAGGAAACTCTGACCGAGCAACGCCGC…	1528	AJ289192.2 Stylosanthes little leaf phytoplasma 16S	phy	AAGAGTTTGATCCTGGCTCAGGATGAACGCTGGCGGCGTGCCTAATACATGCAAGTCGAACGAAAACCCCTCAAAAGGTTTTAGTGGCGAACGGGTGAGTAACACGTAAGTAACCTGCCTTTAAGACGAGAATAACAAATGGAAACATTTGCTAAGACTGGATAGGAAACAAAAAGGCATCTTTTTGTTTTTAAAAGACCTTTTAACAAAGGTATGCTTAAAGAGGGGCTTGCGCCACATTAGTTAGTTGGTAGGGTAAAGGCCTACCAAGACTATGATGTGTAGCTGGACTGAGAGGTTGAACAGCCACATTGGGACTGAGACACGGCCCAAACTCCTACGGGAGGCAGCAGTAGGGAATTTTCGGCAATGGAGGAAACTCTGACCGAGCAACGCCGC…	1528	AJ289192.2 Stylosanthes little leaf phytoplasma 16S	0
4CH	Athysanini	Euscelidius variegatus	SRR17213388	phy	AAGAGTTTGATCCTGGCTCAGGATTAACGCTGGCGGCGTGCCTAATACATGCAAGTCGAACGGAAGTTTAAGCAATTAAACTTTAGTGGCGAACGGGTGAGTAACGCGTAAGCAATCTGCCCCTAAGACGAGGATAACAGTTGGAAACGACTGCTAAGACTGGATAGGAGACAAGAAGGCATCTTCTTATTTTTAAAAGACCTAGCAATAGGTATGCTTAGGGAGGAGCTTGCGTCACATTAGTTAGTTGGTGGGGTAAAGGCCTACCAAGACTATGATGTGTAGCCGGGCTGAGAGGTTGAACGGCCACATTGGGACTGAGACACGGCCCAAACTCCTACGGGAGGCAGCAGTAGGGAATTTTCGGCAATGGAGGAAACTCTGACCGAGCAACGCCGC…	1527	AY265212.1 Aster yellows phytoplasma 16S	phy	AAGAGTTTGATCCTGGCTCAGGATTAACGCTGGCGGCGTGCCTAATACATGCAAGTCGAACGGAAGTTTAAGCAATTAAACTTTAGTGGCGAACGGGTGAGTAACGCGTAAGCAATCTGCCCCTAAGACGAGGATAACAGTTGGAAACGACTGCTAAGACTGGATAGGAGACAAGAAGGCATCTTCTTATTTTTAAAAGACCTAGCAATAGGTATGCTTAGGGAGGAGCTTGCGTCACATTAGTTAGTTGGTGGGGTAAAGGCCTACCAAGACTATGATGTGTAGCCGGGCTGAGAGGTTGAACGGCCACATTGGGACTGAGACACGGCCCAAACTCCTACGGGAGGCAGCAGTAGGGAATTTTCGGCAATGGAGGAAACTCTGACCGAGCAACGCCGC…	1527	AY265212.1 Aster yellows phytoplasma 16S	0
5MX	Scaphytopiini	Scaphytopius aequus		phy	AAGAGTTTGATCCTGGCTCAGGATTAACGCTGGCGGCGTGCCTAATACATGCAAGTCGAACGGAAGTTTAAGCAATTAAACTTTAGTGGCGAACGGGTGAGTAACGCGTAAGCAATCTGCCCCTAAGACGAGGATAACAGTTGGAAACTACTGCTAAGACTGGATAGGAGACAAGAAGGCATCTTCTTGTTTTTAAAAGACCTAGTAATAGGTATGCTTAGGGAGGAGCTTGCGTCACATTAGTTAGTTGGTGGGGTAAAAGCCTACCAAGACTATGATGTGTAGCCGGGCTGAGAGGTTGAACGGCCACATTGGGACTGAGACACGGCCCAAACTCCTACGGGAGGCAGCAGTAGGGAATTTTCGGCAATGGAGGAAACTCTGACCGAGCAACGCCGC…	1527	EU215425.2 Carrot phytoplasma 16S	phy	AAGAGTTTGATCCTGGCTCAGGATTAACGCTGGCGGCGTGCCTAATACATGCAAGTCGAACGGAAGTTTAAGCAATTAAACTTTAGTGGCGAACGGGTGAGTAACGCGTAAGCAATCTGCCCCTAAGACGAGGATAACAGTTGGAAACTACTGCTAAGACTGGATAGGAGACAAGAAGGCATCTTCTTGTTTTTAAAAGACCTAGTAATAGGTATGCTTAGGGAGGAGCTTGCGTCACATTAGTTAGTTGGTGGGGTAAAAGCCTACCAAGACTATGATGTGTAGCCGGGCTGAGAGGTTGAACGGCCACATTGGGACTGAGACACGGCCCAAACTCCTACGGGAGGCAGCAGTAGGGAATTTTCGGCAATGGAGGAAACTCTGACCGAGCAACGCCGC…	1527	EU215425.2 Carrot phytoplasma 16S	0
6MG	Stenometopiini	Gen. sp.	SRR17213251	phy	AAGAGTTTGATCCTGGCTCAGGATGAACGCTGGCGGCGTGCCTAATACATGCAAGTCGAACGGAAACTCTTCGGAGTTTTAGTGGCGAACGGGTGAGTAACACGTAAGCAACCTGCCTTTAAGACGAGAATAACAATTGGAAACAGTTGCTAAGGCTGGATAGGAAACAAAAAGGCATCTTTTTGTTTTTAAAAGACCTTCTTCGGAGGGTATACTTAAAGAGGGGCTTGCGCCACATTAGTTAGTTGGTAGGGTAAAAGCCTACCAAGACGATTATGTGTAGCTGGACTGAGAGGTTGAACAGCCACATTGGGACTGAGACACGGCCCAAACTCCTACGGGAGGCAGCAGTAGGGAATTTTCGGCAATGGAGGAAACTCTGACCGAGCAACGCCGCGT…	1525	MT293886.1 Candidatus Phytoplasma dypsidis 16S	phy	AAGAGTTTGATCCTGGCTCAGGATGAACGCTGGCGGCGTGCCTAATACATGCAAGTCGAACGGAAACTCTTCGGAGTTTTAGTGGCGAACGGGTGAGTAACACGTAAGCAACCTGCCTTTAAGACGAGAATAACAATTGGAAACAGTTGCTAAGGCTGGATAGGAAACAAAAAGGCATCTTTTTGTTTTTAAAAGACCTTCTTCGGAGGGTATACTTAAAGAGGGGCTTGCGCCACATTAGTTAGTTGGTAGGGTAAAAGCCTACCAAGACGATTATGTGTAGCTGGACTGAGAGGTTGAACAGCCACATTGGGACTGAGACACGGCCCAAACTCCTACGGGAGGCAGCAGTAGGGAATTTTCGGCAATGGAGGAAACTCTGACCGAGCAACGCCGCGT…	1525	MT293886.1 Candidatus Phytoplasma dypsidis 16S	0
7IL	Opsiini	Neoaliturus argillaceus		phy	AAGAGTTTGATCCTGGCTCAGGATGAACGCTGGCGGCGCGCCTAATACATGCAAGTCGAACGAAAACCTTCGGGTTTTAGTGGCGAACGGGTGAGTAACACGTAAGCAACCTACCTTTAAGACGTGGATAACAATTGGAAACAGTTGCTAAGACAGGATAGGAAATTAAGAGGCATCTTTTAATTTTTAAAAGACCTTTTTCGGAAGGTATGCTTAAAGAGGGGCTTGCGCCACATTAGTTAGTTGGTAAGGTAAAGGCTTACCAAGACGATGATGTGTAGCTGGACTGAGAGGTTGAACAGCCACATTGGGACTGAGACACGGCCCAAACTCCTACGGGAGGCAGCAGTAAGGAATTTTTGGCAATGGAGGAAACTCTGACCGAGCGACGCCGCGTGA…	1525	MK454714.1 'Coreopsis grandiflora' phyllody phytoplasma 16S	phy	AAGAGTTTGATCCTGGCTCAGGATGAACGCTGGCGGCGCGCCTAATACATGCAAGTCGAACGAAAACCTTCGGGTTTTAGTGGCGAACGGGTGAGTAACACGTAAGCAACCTACCTTTAAGACGTGGATAACAATTGGAAACAGTTGCTAAGACAGGATAGGAAATTAAGAGGCATCTTTTAATTTTTAAAAGACCTTTTTCGGAAGGTATGCTTAAAGAGGGGCTTGCGCCACATTAGTTAGTTGGTAAGGTAAAGGCTTACCAAGACGATGATGTGTAGCTGGACTGAGAGGTTGAACAGCCACATTGGGACTGAGACACGGCCCAAACTCCTACGGGAGGCAGCAGTAAGGAATTTTTGGCAATGGAGGAAACTCTGACCGAGCGACGCCGCGTGA…	1525	MK454714.1 'Coreopsis grandiflora' phyllody phytoplasma 16S	0
8AU	Paralimnini	Micrelloides n. sp.		phy	AAGAGTTTGATCCTGGCTCAGGATGAACGCTGGCGGCGTGCCTAATACATGCAAGTCGAACGGAAACCTTCGGGTTTTAGTGGCGAACGGGTGAGTAACACGTAAGCAACCTGCCCTAATGACGAGGATAACCATTGGAAACAGTGGCTAAGACTGGATAGGAAAATAAAAGGCATCTTTTATTTTTTAAAAGACCTAGCAATAGGTATGCTTTAGGAGGGGCTTGCGCCATATTAGTTAGTTGGTAAGGTAACGGCTTACCAAGACGATGATGTGTAGCTGGACTGAGAGGTTGAACAGCCACATTGGGACTGAGACACGGCCCAAACTCCTACGGGAGGCAGCAGTAGGGAATTTTCGGCAATGGAGGAAACTCTGACCGAGCAACGCCGCGTGAAC…	1524	MW281490.1 Candidatus Phytoplasma sp. 16S	phy	AAGAGTTTGATCCTGGCTCAGGATGAACGCTGGCGGCGTGCCTAATACATGCAAGTCGAACGGAAACCTTCGGGTTTTAGTGGCGAACGGGTGAGTAACACGTAAGCAACCTGCCCTAATGACGAGGATAACCATTGGAAACAGTGGCTAAGACTGGATAGGAAAATAAAAGGCATCTTTTATTTTTTAAAAGACCTAGCAATAGGTATGCTTTAGGAGGGGCTTGCGCCATATTAGTTAGTTGGTAAGGTAACGGCTTACCAAGACGATGATGTGTAGCTGGACTGAGAGGTTGAACAGCCACATTGGGACTGAGACACGGCCCAAACTCCTACGGGAGGCAGCAGTAGGGAATTTTCGGCAATGGAGGAAACTCTGACCGAGCAACGCCGCGTGAAC…	1524	MW281490.1 Candidatus Phytoplasma sp. 16S	0
9TW	Opsiini	Alishania formosana	SRR17212875	phy	AAGAGTTTGATCCTGGCTCAGGATGAACGCTGGCGGCGTGCCTAATACATGCAAGTCGAACGGAAACTCTTTGAGTTTTAGTGGCGAACGGGTGAGTAACACGTAAGCAACCTACCTTTAAGACGAGAATAACAATTGGAAACAGTTGCTAAGGCTGGATAGGAAACAGAAAGGCATCTTTTTGTTTTTAAAAGACCTTCTTCGGAGGGTATGCTTAAAGAGGGGCTTGCGCCACATTAGTTAGTTGGTAGGGTAAAGGCCTACCAAGACGATGATGTGTAGCTGGACTGAGAGGTTGAACAGCCACATTGGGACTGAGACACGGCCCAAACTCCTACGGGAGGCAGCAGTAGGGAATTTTCGGCAATGGAGGAAACTCTGACCGAGCAACGCCGCGTG…	1523	X80117.1 Phytoplasma sp. 16S	phy	AAGAGTTTGATCCTGGCTCAGGATGAACGCTGGCGGCGTGCCTAATACATGCAAGTCGAACGGAAACTCTTTGAGTTTTAGTGGCGAACGGGTGAGTAACACGTAAGCAACCTACCTTTAAGACGAGAATAACAATTGGAAACAGTTGCTAAGGCTGGATAGGAAACAGAAAGGCATCTTTTTGTTTTTAAAAGACCTTCTTCGGAGGGTATGCTTAAAGAGGGGCTTGCGCCACATTAGTTAGTTGGTAGGGTAAAGGCCTACCAAGACGATGATGTGTAGCTGGACTGAGAGGTTGAACAGCCACATTGGGACTGAGACACGGCCCAAACTCCTACGGGAGGCAGCAGTAGGGAATTTTCGGCAATGGAGGAAACTCTGACCGAGCAACGCCGCGTG…	1523	X80117.1 Phytoplasma sp. 16S	0
10US	Paralimnini	Diplocolenus evansi		phy	AAGAGTTTGATCCTGGCTCAGGATAAACGCTGGCGGCGTGCCTAATACATGCAAGTCGAACGGAAATCTTCGGATTTTAGTGGCGAACGGGTGAGTAACACGTAAGTAACCTGCCTTTAAGACGAGAATAACAATTGGAAACAGTTGCTAAGACTGGATAGGAAATTAAAAGGCATCTTTTAATTTTTAAAAGACCTTTTTCGGAAGGTATGCTTAAAGAGGGGCTTGCGACACATTAGTTAGTTGGTAGGGTAAAGGCCTACCAAGACTATGATGTGTAGCTGGACTGAGAGGTCGAACAGCCACATTGGGACTGAGACACGGCCCAAACTCCTACGGGAGGCAGCAGTAGGGAATTTTCGGCAATGGAGGAAACTCTGACCGAGCAACGCCGCGTGA…	1522	HQ589192.1 'Psammotettix cephalotes' flower stunt phytoplasma 16S	phy	AAGAGTTTGATCCTGGCTCAGGATAAACGCTGGCGGCGTGCCTAATACATGCAAGTCGAACGGAAATCTTCGGATTTTAGTGGCGAACGGGTGAGTAACACGTAAGTAACCTGCCTTTAAGACGAGAATAACAATTGGAAACAGTTGCTAAGACTGGATAGGAAATTAAAAGGCATCTTTTAATTTTTAAAAGACCTTTTTCGGAAGGTATGCTTAAAGAGGGGCTTGCGACACATTAGTTAGTTGGTAGGGTAAAGGCCTACCAAGACTATGATGTGTAGCTGGACTGAGAGGTCGAACAGCCACATTGGGACTGAGACACGGCCCAAACTCCTACGGGAGGCAGCAGTAGGGAATTTTCGGCAATGGAGGAAACTCTGACCGAGCAACGCCGCGTGA…	1522	HQ589192.1 'Psammotettix cephalotes' flower stunt phytoplasma 16S	0
11FR	Fieberiellini	Synophropsis lauri	SRR17213157	phy	AAGAGTTTGATCCTGGCTCAGGATGAACGCTGGCGGCGTGCCTAATACATGCAAGTCGAACGGAAACCTTCGGGTTTTAGTGGCGAACGGGTGAGTAACACGTAAGCAACCTGCCCTTAAGACGAGGATAACAATTGGAAACAGTTGCTAAGACTGGATAGGAAAAGTAAAGGCATCTTTACTTTTTTAAAAGACCTTCTTTGAAGGTATGCTTGAGGAGGGGCTTGCGACACATTAGTTAGTTGGCAGGGTAAAGGCCTACCAAGACTATGATGTGTAGCTGGACTGAGAGGTTGAACAGCCACATTGGGACTGAGACACGGCCCAAACTCCTACGGGAGGCAGCAGTAGGGAATTTTCGGCAATGGAGGAAACTCTGACCGAGCAACGCCGCGTGAA…	1522	AF173558.1 Clover yellow edge phytoplasma 16S	phy	AAGAGTTTGATCCTGGCTCAGGATGAACGCTGGCGGCGTGCCTAATACATGCAAGTCGAACGGAAACCTTCGGGTTTTAGTGGCGAACGGGTGAGTAACACGTAAGCAACCTGCCCTTAAGACGAGGATAACAATTGGAAACAGTTGCTAAGACTGGATAGGAAAAGTAAAGGCATCTTTACTTTTTTAAAAGACCTTCTTTGAAGGTATGCTTGAGGAGGGGCTTGCGACACATTAGTTAGTTGGCAGGGTAAAGGCCTACCAAGACTATGATGTGTAGCTGGACTGAGAGGTTGAACAGCCACATTGGGACTGAGACACGGCCCAAACTCCTACGGGAGGCAGCAGTAGGGAATTTTCGGCAATGGAGGAAACTCTGACCGAGCAACGCCGCGTGAA…	1522	AF173558.1 Clover yellow edge phytoplasma 16S	0
12ZM	Selenocephalini	Abimwa sp.	SRR17213239	phy	AAGAGTTTGATCCTGGCTCAGGATGAACGCTGGCGGCGTGCCTAATACATGCAAGTCGAACGGAAACCTTCGGGTTTTAGTGGCGAACGGGTGAGTAACACGTAAGCAACCTGCCCTTAAGACGAGGATAACAATTGGAAACAGTTGCTAAGACTGGATAGGAAAAGTAAAGGCATCTTTACTTTTTTAAAAGACCTTCTTTGAAGGTATGCTTGAGGAGGGGCTTGCGACACATTAGTTAGTTGGCAGGGTAAAGGCCTACCAAGACTATGATGTGTAGCTGGACTGAGAGGTTGAACAGCCACATTGGGACTGAGACACGGCCCAAACTCCTACGGGAGGCAGCAGTAGGGAATTTTCGGCAATGGAGGAAACTCTGACCGAGCAACGCCGCGTGAA…	1522	AF173558.1 Clover yellow edge phytoplasma 16S	phy	AAGAGTTTGATCCTGGCTCAGGATGAACGCTGGCGGCGTGCCTAATACATGCAAGTCGAACGGAAACCTTCGGGTTTTAGTGGCGAACGGGTGAGTAACACGTAAGCAACCTGCCCTTAAGACGAGGATAACAATTGGAAACAGTTGCTAAGACTGGATAGGAAAAGTAAAGGCATCTTTACTTTTTTAAAAGACCTTCTTTGAAGGTATGCTTGAGGAGGGGCTTGCGACACATTAGTTAGTTGGCAGGGTAAAGGCCTACCAAGACTATGATGTGTAGCTGGACTGAGAGGTTGAACAGCCACATTGGGACTGAGACACGGCCCAAACTCCTACGGGAGGCAGCAGTAGGGAATTTTCGGCAATGGAGGAAACTCTGACCGAGCAACGCCGCGTGAA…	1522	AF173558.1 Clover yellow edge phytoplasma 16S	0
13BR	Macrostelini	Dalbulus maidis	SRR17213214	phy	ACTGCTAAGACTGGATAGGAGACAAGAAGGCATCTTCTTGTTTTTAAAAGACCTAGCAATAGGTATGCTTAGGGAGGAGCTTGCGTCACATTAGTTAGTTGGTGGGGTAAAGGCCTACCAAGACTATGATGTGTAGCCGGGCTGAGAGGTTGAACGGCCACATTGGGACTGAGACACGGCCCAAACTCCTACGGGAGGCAGCAGTAGGGAATTTTCGGCAATGGAGGAAACTCTGACCGAGCAACGCCGCGTGAACGATGAAGTATTTCGGTACGTAAAGTTCTTTTATTAGGGAAGAATAAATGATGGAAAAATCATTCTGACGGTACCTAATGAATAAGCCCCGGCTAACTATGTGCCAGCAGCCGCGGTAATACATAGGGGGCAAGCGTTATCCGG…	1378	CP035949.1 'Catharanthus roseus' aster yellows phytoplasma 16S	phy	AGGATAACAGTTGGAAACTACTGCTAAGACTGGATAGGAGACAAGAAGGCATCTTCTTGTTTTTAAAAGACCTAGCAATAGGTATGCTTAGGGAGGAGCTTGCGTCACATTAGTTAGTTGGTGGGGTAAAGGCCTACCAAGACTATGATGTGTAGCCGGGCTGAGAGGTTGAACGGCCACATTGGGACTGAGACACGGCCCAAACTCCTACGGGAGGCAGCAGTAGGGAATTTTCGGCAATGGAGGAAACTCTGACCGAGCAACGCCGCGTGAACGATGAAGTATTTCGGTACGTAAAGTTCTTTTATTAGGGAAGAATAAATGATGGAAAAATCATTCTGACGGTACCTAATGAATAAGCCCCGGCTAACTATGTGCCAGCAGCCGCGGTAATACATA…	1397	CP015149.1 Maize bushy stunt phytoplasma 16S	19
14CN	Athysanini	Nakaharanus bimaculatus		phy	AAGAGTTTGATCCTGGCTCAGGATGAACGCTGGCGGCGTGCCTAATACATGCAAGTCGAACGGAAACCTTCGGGTTTTAGTGGCGAACGGGTGAGTAACACGTAAGCAACCTGCCCTTAAGACGAGGATAACAATTGGAAACAGTTGCTAAGACTGGATAGGAAAAGTAAAGGCATCTTTACTTTTTTAAAAGACCTTCTTTGAAGGTATGCTTGAGGAGGGGCTTGCGACACATTAGTTAGTTGGCAGGGTAAAGGCCTACCAAGACTATGATGTGTAGCTGGACTGAGAGGTTGAACAGCCACATTGGGACTGAGACACGGCCCAAACTCCTACGGGAGGCAGCAGTAGGGAATTTTCGGCAATGGAGGAAACTCTGACCGAGCAACGCCGCGTGAA…	1522	AF173558.1 Clover yellow edge phytoplasma 16S	phy	AAGAGTTTGATCCTGGCTCAGGATGAACGCTGGCGGCGTGCCTAATACATGCAAGTCGAACGGAAACCTTCGGGTTTTAGTGGCGAACGGGTGAGTAACACGTAAGCAACCTGCCCTTAAGACGAGGATAACAATTGGAAACAGTTGCTAAGACTGGATAGGAAAAGTAAAGGCATCTTTACTTTTTTAAAAGACCTTCTTTGAAGGTATGCTTGAGGAGGGGCTTGCGACACATTAGTTAGTTGGCAGGGTAAAGGCCTACCAAGACTATGATGTGTAGCTGGACTGAGAGGTTGAACAGCCACATTGGGACTGAGACACGGCCCAAACTCCTACGGGAGGCAGCAGTAGGGAATTTTCGGCAATGGAGGAAACTCTGACCGAGCAACGCCGCGTGAA…	1522	AF173558.1 Clover yellow edge phytoplasma 16S	0
15CA	Limotettigini	Limotettix urnura		phy	AAGAGTTTGATCCTGGCTCAGGATAAACGCTGGCGGCGTGCCTAATACATGCAAGTCGAACGGAAATCTTCGGATTTTAGTGGCGAACGGGTGAGTAACACGTAAGTAACCTGCCTTTAAGACGAGAATAACATTTGGAAACAATTGCTAAGGCTGGATAGGAAATTAAAAGGCATCTTTTAATTTTTAAAAGACCTTCTACGAAGGTATGCTTAAAGAGGGGCTTGCGGCACATTAGTTAGTTGGTAGGGTAAAGGCCTACCAAGACTATAATGTGTAGCTGGACTGAGAGGTCGAACAGCCACATTGGGACTGAGACACGGCCCAAACTCCTACGGGAGGCAGCAGTAGGGAATTTTCGGCAATGGAGGAAACTCTGACCGAGCAACGCCGCGTGAA…	1521	KR869146.1 Candidatus Phytoplasma cirsii 16S	phy	AAGAGTTTGATCCTGGCTCAGGATAAACGCTGGCGGCGTGCCTAATACATGCAAGTCGAACGGAAATCTTCGGATTTTAGTGGCGAACGGGTGAGTAACACGTAAGTAACCTGCCTTTAAGACGAGAATAACATTTGGAAACAATTGCTAAGGCTGGATAGGAAATTAAAAGGCATCTTTTAATTTTTAAAAGACCTTCTACGAAGGTATGCTTAAAGAGGGGCTTGCGGCACATTAGTTAGTTGGTAGGGTAAAGGCCTACCAAGACTATAATGTGTAGCTGGACTGAGAGGTCGAACAGCCACATTGGGACTGAGACACGGCCCAAACTCCTACGGGAGGCAGCAGTAGGGAATTTTCGGCAATGGAGGAAACTCTGACCGAGCAACGCCGCGTGAA…	1521	KR869146.1 Candidatus Phytoplasma cirsii 16S	0
16FR	Chiasmini	Doratura homophyla	SRR17213015	phy	GTTTTTAAAAGACCTAGTAATAGGTATGCTTAGGGAGGAGCTTGCGTCACATTAGTTAGTTGGTGGGGTAAAGGCCTACCAAGACTATGATGTGTAGCCGGGCTGAGAGGTTGAACGGCCACATTGGGACTGAGACACGGCCCAAACTCCTACGGGAGGCAGCAGTAGGGAATTTTCGGCAATGGAGGAAACTCTGACCGAGCAACGCCGCGTGAACGATGAAGTATTTCGGTACGTAAAGTTCTTTTATTAGGGAAGAATAAATGATGGAAAAATCATTCTGACGGTACCTAATGAATAAGCCCCGGCTAACTATGTGCCAGCAGCCGCGGTAATACATAGGGGGCAAGCGTTATCCGGAATTATTGGGCGTAAAGGGTGCGTAGGCGGTTAAATAAG…	1339	CP035949.1 'Catharanthus roseus' aster yellows phytoplasma 16S	phy	AAGAGTTTGATCCTGGCTCAGGATTAACGCTGGCGGCGTGCCTAATACATGCAAGTCGAACGGAAGTTTAAGCAATTAAACTTTAGTGGCGAACGGGTGAGTAACGCGTAAGCAATCTGCCCCTAAGACGAGGATAACAGTTGGAAACTACTGCTAAGACTGGATAGGAGACAAGAAGGCATCTTCTTGTTTTTAAAAGACCTAGTAATAGGTATGCTTAGGGAGGAGCTTGCGTCACATTAGTTAGTTGGTGGGGTAAAGGCCTACCAAGACTATGATGTGTAGCCGGGCTGAGAGGTTGAACGGCCACATTGGGACTGAGACACGGCCCAAACTCCTACGGGAGGCAGCAGTAGGGAATTTTCGGCAATGGAGGAAACTCTGACCGAGCAACGCCGC…	1527	CP015149.1 Maize bushy stunt phytoplasma 16S	188
17MN	Macrostelini	Macrosteles guttatus	SRR17213107	phy	CAAGACTATGATGTGTAGCCGGGCTGAGAGGTTGAACGGCCACATTGGGACTGAGACACGGCCCAAACTCCTACGGGAGGCAGCAGTAGGGAATTTTCGGCAATGGAGGAAACTCTGACCGAGCAACGCCGCGTGAACGATGAAGTATTTCGGTACGTAAAGTTCTTTTATTAGGGAAGAATAAATGATGGAAAAATCATTCTGACGGTACCTAATGAATAAGCCCCGGCTAACTATGTGCCAGCAGCCGCGGTAATACATAGGGGGCAAGCGTTATCCGGAATTATTGGGCGTAAAGGGTGCGTAGGCGGTTAAATAAGTTTATGGTCTAAGTGCAATGCTCAACATTGTGATGCTATAAAAACTGTTTAGCTAGAGTAAGATAGAGGCAAGTGGAAT…	1260	CP055264.1 Rapeseed phyllody phytoplasma 16S	phy	AAGAGTTTGATCCTGGCTCAGGATTAACGCTGGCGGCGTGCCTAATACATGCAAGTCGAACGGAAGTTTAAGCAATTAAACTTTAGTGGCGAACGGGTGAGTAACGCGTAAGCAATCTGCCCCTAAGACGAGGATAACAGTTGGAAACGACTGCTAAGACTGGATAGGAGACAAGAGGGCATCTTCTTGTTTTTAAAAGACCTAGCAATAGGTATGCTTAGGGAGGAGCTTGCGTCACATTAGTTAGTTGGTGGGGTAAAGGCCTAACAAGACTATGATGTGTAGCCGGGCTGAGAGGTTGAACGGCCACATTGGGACTGAGACACGGCCCAAACTCCTACGGGAGGCAGCAGTAGGGAATTTTCGGCAATGGAGGAAACTCTGACCGAGCAACGCCGC…	1527	AY744071.1 Hyacinth virescence phytoplasma 16S	267
18MN	Paralimnini	Adarrus n. sp.		phy-part	AAGTCGAACGGAGACCCTTCAAAAGGTCTTAGTGGCGAACGGGTGAGTAACACGTAAGTAACCTACCTTTAAGACGAGGATAACAATCGGAAACGGTTGCTAAGACTGGATAGGAAACAGAAAGGCATCTTTTTGTTTTTAAAAGACCTTCTTCGGAGGGTATGCTTAAAGAGGGGCTTGCGCCACATTAGTTAGTTGGTGAGGTAAAGGCTTACCAAGATTATGATGTGTAGCTGGACTGAGAGGTTGAACAGCCACATTGGGACTGAGACACGGCCCAAACTCCTACGGGAGGCAGCAGTAGGGAATTTTCGGCAATGGAGGAAACTCTGACCGAGCGACGCCGCGTGAACGATGAAGTATTTCGGTATGTAAAGTTCTTTTATTGAAGAAGAAAAA…	1235	MK440304.1 'Artemisia vulgaris' witches'-broom phytoplasma 16S	phy-part	AAGTCGAACGGAGACCCTTCAAAAGGTCTTAGTGGCGAACGGGTGAGTAACACGTAAGTAACCTACCTTTAAGACGAGGATAACAATCGGAAACGGTTGCTAAGACTGGATAGGAAACAGAAAGGCATCTTTTTGTTTTTAAAAGACCTTCTTCGGAGGGTATGCTTAAAGAGGGGCTTGCGCCACATTAGTTAGTTGGTGAGGTAAAGGCTTACCAAGATTATGATGTGTAGCTGGACTGAGAGGTTGAACAGCCACATTGGGACTGAGACACGGCCCAAACTCCTACGGGAGGCAGCAGTAGGGAATTTTCGGCAATGGAGGAAACTCTGACCGAGCGACGCCGCGTGAACGATGAAGTATTTCGGTATGTAAAGTTCTTTTATTGAAGAAGAAAAA…	1235	MK440304.1 'Artemisia vulgaris' witches'-broom phytoplasma 16S	0
19CD	Scaphoideini	n. gen. ZA5 n. sp. 1		phy-part	AAGTCGAACGGAGACCCTTCAAAAGGTCTTAGTGGCGAACGGGTGAGTAACACGTAAGTAACCTACCTTTAAGACGAGGATAACAATCGGAAACGGTTGCTAAGACTGGATAGGAAACAGAAAGGCATCTTTTTGTTTTTAAAAGACCTTCTTCGGAGGGTATGCTTAAAGAGGGGCTTGCGCCACATTAGTTAGTTGGTGAGGTAAAGGCTTACCAAGATTATGATGTGTAGCTGGACTGAGAGGTTGAACAGCCACATTGGGACTGAGACACGGCCCAAACTCCTACGGGAGGCAGCAGTAGGGAATTTTCGGCAATGGAGGAAACTCTGACCGAGCGACGCCGCGTGAACGATGAAGTATTTCGGTATGTAAAGTTCTTTTATTGAAGAAGAAAAA…	1235	MK440304.1 'Artemisia vulgaris' witches'-broom phytoplasma 16S	phy-part	AAGTCGAACGGAGACCCTTCAAAAGGTCTTAGTGGCGAACGGGTGAGTAACACGTAAGTAACCTACCTTTAAGACGAGGATAACAATCGGAAACGGTTGCTAAGACTGGATAGGAAACAGAAAGGCATCTTTTTGTTTTTAAAAGACCTTCTTCGGAGGGTATGCTTAAAGAGGGGCTTGCGCCACATTAGTTAGTTGGTGAGGTAAAGGCTTACCAAGATTATGATGTGTAGCTGGACTGAGAGGTTGAACAGCCACATTGGGACTGAGACACGGCCCAAACTCCTACGGGAGGCAGCAGTAGGGAATTTTCGGCAATGGAGGAAACTCTGACCGAGCGACGCCGCGTGAACGATGAAGTATTTCGGTATGTAAAGTTCTTTTATTGAAGAAGAAAAA…	1235	MK440304.1 'Artemisia vulgaris' witches'-broom phytoplasma 16S	0
20PE	Chiasmini	Exitianus obscurinervis	SRR17213043	phy-part	AGCAGTAGGGAATTTTCGGCAATGGAGGAAACTCTGACCGAGCAACGCCGCGTGAACGATGAAGTACCTCGGTATGTAAAGTTCTTTTATTAAGGAAGAAAAAAGAGTGGAAAAACTCCCTTGACGGTACTTAATGAATAAGCCCCGGCTAATTATGTGCCAGCAGCCGCGGTAATACATAAGGGGCGAGCGTTATCCGGAATGATTGGGCGTAAAGGGTGCGTAGGCGGTTTAATAAGTCTATAGTTTAATTTCAGTGCTTAACGCTGTTGTGCTATAGAAACTGTTTTACTAGAGTGAGATAGAGGCAAGCGGAATTCCATGTGTAGCGGTAAAATGCGTAAATATATGGAGGAACACCAGAGGCGTAGGCGGCTTGCTGGGTCTTTACTGACGCTG…	1179	KY778013.1 Mexican Naolinco periwinkle virescence phytoplasma 16S	phy	GTTTGATCCTGGCTCAGGATGAACGCTGGCGGCGTGCCTAATACATGCAAGTCGAACGGAAACCTTCGGGTTTTAGTGGCGAACGGGTGAGTAACACGTAAGCAACCTGCCCTTAAGACGAGGATAACAATTGGAAACAGTTGCTAAGACTGGATAGGAAAAGTAAAGGCATCTTTACTTTTTTAAAAGACCTTCTTTGAAGGTATGCTTGAGGAGGGGCTTGCGACACATTAGTTAGTTGGCAGGGTAAAGGCCTACCAAGACTATGATGTGTAGCTGGACTGAGAGGTTGAACAGCCACATTGGGACTGAGACACGGCCCAAACTCCTACGGGAGGCAGCAGTAGGGAATTTTCGGCAATGGAGGAAACTCTGACCGAGCAACGCCGCGTGAACGAT…	1518	AF173558.1 Clover yellow edge phytoplasma 16S	339
21ZA	Chiasmini	Aconurella prolixa	SRR17213444	phy-part	TGAACGATGAAGTACCTCGGTATGTAAAGTTCTTTTATTAAGGAAGAAAAAAGAGTGGAAAAACTCCCTTGACGGTACTTAATGAATAAGCCCCGGCTAATTATGTGCCAGCAGCCGCGGTAATACATAAGGGGCGAGCGTTATCCGGAATGATTGGGCGTAAAGGGTGCGTAGGCGGTTTAATAAGTCTATAGTTTAATTTCAGTGCTTAACGCTGTTGTGCTATAGAAACTGTTTTACTAGAGTGAGATAGAGGCAAGCGGAATTCCATGTGTAGCGGTAAAATGCGTAAATATATGGAGGAACACCAGAGGCGTAGGCGGCTTGCTGGGTCTTTACTGACGCTGAGGCACGAAAGCGTGGGGAGCAAACAGGATTAGATACCCTGGTAGTCCACGC…	804	MN807435.1 Candidatus Phytoplasma luffae 16S	phy	AACGGAAACCTTCGGGTTTTAGTGGCGAACGGGTGAGTAACACGTAAGCAACCTGCCCTTAAGACGAGGATAACAATTGGAAACAGTTGCTAAGACTGGATAGGAAAAGTAAAGGCATCTTTACTTTTTTAAAAGACCTTCTTTGAAGGTATGCTTGAGGAGGGGCTTGCGACACATTAGTTAGTTGGCAGGGTAAAGGCCTACCAAGACTATGATGTGTAGCTGGACTGAGAGGTTGAACAGCCACATTGGGACTGAGACACGGCCCAAACTCCTACGGGAGGCAGCAGTAGGGAATTTTCGGCAATGGAGGAAACTCTGACCGAGCAACGCCGCGTGAACGATGAAGTACCTCGGTATGTAAAGTTCTTTTATTAAGGAAGAAAAAAGAGTGGAAAA…	1464	KY778013.1 Mexican Naolinco periwinkle virescence phytoplasma 16S	660
22CH	Scaphoideini	Osbornellus auronitens		phy-part	GGGAGCAAACAGGATTAGATACCCTGGTAGTCCACGCTGTAAACGATGAGTACTAAGTGTCGGGGTAACTCGGTACTGAAGTTAACACATTAAGTACTCCGCCTGAGTAGTACGTACGCAAGTATGAAACTTAAAGGAATTGACGGGACTCCGCACAAGCGGTGGATCATGTTGTTTAATTCGAAGATACACGAAAAACCTTACCAGGTCTTGACATACTCTGCAAAGCTATAGAAATATAGTGGAGGTTATCAGGGATACAGGTGGTGCATGGTTGTCGTCAGTTCGTGTCGTGAGATGTTAGGTTAAGTCCTAAAACGAACGCAACCCCTGTCGCTAGTTGCCAGCACGTAATGGTGGGGACTTTAGCGAGACTGCCAATTAAACATTGGAGGAAGG…	764	MN394842.1 Candidatus Phytoplasma sp. 16S	phy	GAGAGTTTGATCCTGGCTCAGGATGAACGCTGGCGGCGCGCCTAATACATGCAAGTCGAACGGAGACCCTTCAAAAGGTCTTAGTGGCGAACGGGTGAGTAACACGTAAGTAACCTACCTTTAAGACGAGGATAACAATCGGAAACGGTTGCTAAGACTGGATAGGAAACAGAAAGGCATCTTTTTGTTTTTAAAAGACCTTCTTCGGAGGGTATGCTTAAAGAGGGGCTTGCGCCACATTAGTTAGTTGGTGAGGTAAAGGCTTACCAAGATTATGATGTGTAGCTGGACTGAGAGGTTGAACAGCCACATTGGGACTGAGACACGGCCCAAACTCCTACGGGAGGCAGCAGTAGGGAATTTTCGGCAATGGAGGAAACTCTGACCGAGCGACGCCGC…	1527	AY197645.1 Flavescence doree phytoplasma 16S	763
23CN	Scaphoideini	Amimenus mojiensis	SRR17213331	phy-part	GTATGAAACTTAAAGGAATTGACGGGACTCCGCACAAGCGGTGGATCATGTTGTTTAATTCGAAGGTACCCGAAAAACCTCACCAGGTCTTGACATGCTTCTGCAAAGCTGTAGAAACACAGTGGAGGTTATCAGTTGCACAGGTGGTGCATGGTTGTCGTCAGCTCGTGTCGTGAGATGTTGGGTTAAGTCCCGCAACGAGCGCAACCCTTATTGTTAGTTACCAGCACGTAATGGTGGGGACTTTAGCAAGACTGCCAGTGATAAATTGGAGGAAGGTGGGGACGACGTCAAATCATCATGCCCCTTATGACCTGGGCTACAAACGTGATACAATGGCTGTTACAAAGGGTAGCTGAAGCGCAAGTTTTTGGCGAATCTCAAAAAAACAGTCTCAGT…	644	CP055264.1 Rapeseed phyllody phytoplasma 16S	phy	AAGAGTTTGATCCTGGCTCAGGATTAACGCTGGCGGCGTGCCTAATACATGCAAGTCGAACGGAAGTTTAAGCAATTAAACTTTAGTGGCGAACGGGTGAGTAACGCGTAAGCAATCTGCCCCTAAGACGAGGATAACAGTTGGAAACGACTGCTAAGACTGGATAGGAGACAAGAAGGCATCTTCTTGTTTTTAAAAGACCTAGCAATAGGTATGCTTAGGGAAGAGCTTGCGTCACATTAGTTAGTTGGTGGGGTAAAGGCCTACCAAGACTATGATGTGTAGCCGGGCTGAGAGGTTGAACGGCCACATTGGGACTGAGACACGGCCCAAACTCCTACGGGAGGCAGCAGTAGGGAATTTTCGGCAATGGAGGAAACTCTGACCGAGCAACGCCGC…	1526	CP055264.1 Rapeseed phyllody phytoplasma 16S	882
24FR	Scaphoideini	Anoplotettix putoni		oBa-part	TGGACCTGCGCCGTATTAGCTAGTTGGTAAGGTAACGGCTTACCAAGGCAACGATACGTAGCCGACCTGAGAGGGTGATCGGCCACACTGGAACTGAGACACGGTCCAGACTCCTACGGGAGGCAGCAGTAGGGAATCTTCCGCAATGGGCGAAAGCCTGACGGAGCAACGCCGCGTGAGTGATGAAGGTCTTCGGATCGTAAAACTCTGTTATTAGGGAAGAACAAACGTGTAAGTAACTGTGCACGTCTTGACGGTACCTAATCAGAAAGCCACGGCTAACTACGTGCCAGCAGCCGCGGTAATACGTAGGTGGCAAGCGTTATCCGGAATTATTGGGCGTAAAGCGCGCGTAGGCGGTTTTTTAAGTCTGATGTGAAAGCCCACGGCTCAACCGTG…	599	ON340568.1 Staphylococcus sp. 16S	oBa	GAGAGTTTGATCCTGGCTCAGGACGAACGCTGGCGGCGTGCTTAACACATGCAAGTCGAACGGAAAGGCCCTGCTTTTGTGGGGTGCTCGAGTGGCGAACGGGTGAGTAACACGTGAGTAACCTGCCCTTGACTTTGGGATAACTTCAGGAAACTGGGGCTAATACCGGATAGGAGCTCCTGGAGTTTTTGTGAGTGGAATGTAAAGATGGCTCTGCTATCACTTATAGATGGACCTGCGCCGTATTAGCTAGTTGGTAAGGTAACGGCTTACCAAGGCAACGATACGTAGCCGACCTGAGAGGGTGATCGGCCACACTGGAACTGAGACACGGTCCAGACTCCTACGGGAGGCAGCAGTAGGGAATCTTCCGCAATGGGCGAAAGCCTGACGGAGCAA…	1431	MZ014435.1 Staphylococcus hominis 16S	832
25AU	Deltocephalini	n. gen. AU3 n. sp. 2		phy-part	ACCAAGACTATGATGTGTAGCTGGACTGAGAGGTTGAACAGCCACATTGGGACTGAGACACGGCCCAAACTCCTACGGGAGGCAGCAGTAGGGAATTTTCGGCAATGGAGGAAACTCTGACCGAGCAACGCCGCGTGAACGATGAAGTATTTCGGTATGTAAAGTTCTTTTATTGAAGAAGAAAAAATAGTGGAAAAACTATCTTGACGCTATTCAATGAATAAGCCCCGGCAAACTATGTGCCAGCAGCCGCGGTAATACATAGGGGGCGAGCGTTATCCGGAATTATTGGGCGTAAAGGGTGCGTAGGCGGTTTAATAAGTCTATAGTTTAATTTCAGTGCTTAACACTGTCCTGCTATAGAAACTATTAAACTAGAGTGAGATAGAGGCAAGTGGA…	533	KM924296.1 Goosegrass white leaf phytoplasma 16S	phy-part	ACCAAGACTATGATGTGTAGCTGGACTGAGAGGTTGAACAGCCACATTGGGACTGAGACACGGCCCAAACTCCTACGGGAGGCAGCAGTAGGGAATTTTCGGCAATGGAGGAAACTCTGACCGAGCAACGCCGCGTGAACGATGAAGTATTTCGGTATGTAAAGTTCTTTTATTGAAGAAGAAAAAATAGTGGAAAAACTATCTTGACGCTATTCAATGAATAAGCCCCGGCAAACTATGTGCCAGCAGCCGCGGTAATACATAGGGGGCGAGCGTTATCCGGAATTATTGGGCGTAAAGGGTGCGTAGGCGGTTTAATAAGTCTATAGTTTAATTTCAGTGCTTAACACTGTCCTGCTATAGAAACTATTAAACTAGAGTGAGATAGAGGCAAGTGGA…	910	AB741629.1 Goosegrass white leaf phytoplasma 16S	377
26PH	Scaphoideini	n. gen. PH1 n. sp.		phy-part	TAAGCAATCTGCCCCTAAGACGAGGATAACAGTTGGAAACGACTGCTAAGACTGGATAGGAGACAAGAAGGCATCTTCTTGTTTTTAAAAGACCTAGCAATAGGTATGCTTAGGGAGGAGCTTGCGTCACATTAGTTAGTTGGTGGGGCAAAGGCCTACCAAGACTATGATGTGTAGCCGGGCTGAGAGGTTGAACGGCCACATTGGGACTGAGACACGGCCCAAACTCCTACGGGAGGCAGCAGTAGGGAATTTTCGGCAATGGAGGAAACTCTGACCGAGCAACGCCGCGTGAACGATGAAGTATTTCGGTACGTAAAGTTCTTTTATTAGGGAAGAATAAATGATGGAAAAATCATTCTGACGGTACCTAATGAATAAGCCCCGGCTAACTATGTG…	423	ON332489.1 'Sesamum indicum' phytoplasma 16S	phy	AAGAGTTTGATCCTGGCTCAGGATTAACGCTGGCGGCGTGCCTAATACATGCAAGTCGAACGGAAGTTTAAGCAATTAAACTTTAGTGGCGAACGGGTGAGTAACGCGTAAGCAATCTGCCCCTAAGACGAGGATAACAGTTGGAAACGACTGCTAAGACTGGATAGGAGACAAGAAGGCATCTTCTTGTTTTTAAAAGACCTAGCAATAGGTATGCTTAGGGAGGAGCTTGCGTCACATTAGTTAGTTGGTGGGGCAAAGGCCTACCAAGACTATGATGTGTAGCCGGGCTGAGAGGTTGAACGGCCACATTGGGACTGAGACACGGCCCAAACTCCTACGGGAGGCAGCAGTAGGGAATTTTCGGCAATGGAGGAAACTCTGACCGAGCAACGCCGC…	1527	JN005710.1 'Populus nigra' phytoplasma 16S	1104
27US	Deltocephalini	Graminella sonora		phy-part	AAGAGTTTGATCCTGGCTCAGGATTAACGCTGGCGGCGTGCCTAATACATGCAAGTCGAACGGAAGTTTAAGCAATTAAACTTTAGTGGCGAACGGGTGAGTAACGCGTAAGCAATCTGCCCCTAAGACGAGGATAACAGTTGGAAACTACTGCTAAGACTGGATAGGAGACAAGAAGGCATCTTCTTGTTTTTAAAAGACCTAGTAATAGGTATGCTTAGGGAGGAGCTTGCGTCACATTAGTTAGTTGGTGGGGTAAAGGCCTACCAAGACTATGATGTGTAGCCGGGCTGAGAGGTTGAACGGCCACATTGGGACTGAGACACGGCCCAAACTCCTACGGGAGGCAGCAGTAGGGA	359	EU215425.2 Carrot phytoplasma sp. 16S	phy	AAGAGTTTGATCCTGGCTCAGGATTAACGCTGGCGGCGTGCCTAATACATGCAAGTCGAACGGAAGTTTAAGCAATTAAACTTTAGTGGCGAACGGGTGAGTAACGCGTAAGCAATCTGCCCCTAAGACGAGGATAACAGTTGGAAACTACTGCTAAGACTGGATAGGAGACAAGAAGGCATCTTCTTGTTTTTAAAAGACCTAGTAATAGGTATGCTTAGGGAGGAGCTTGCGTCACATTAGTTAGTTGGTGGGGTAAAGGCCTACCAAGACTATGATGTGTAGCCGGGCTGAGAGGTTGAACGGCCACATTGGGACTGAGACACGGCCCAAACTCCTACGGGAGGCAGCAGTAGGGAATTTTCGGCAATGGAGGAAACTCTGACCGAGCAACGCCGC…	1527	CP015149.1 Maize bushy stunt phytoplasma 16S	1168
28ZA	Opsiini	Neoaliturus angulatus	SRR17213185	oBa-part	GGTGCATGGTTGTCGTCAGCTCGTGTCGTGAGATGTTGGGTTAAGTCCCATAACGAGCGCAACCCCTATCGTTAGTTACCATCATTAAGTTGGGGACTCTAGCGATACTGCCGGTGATAAACCGGAGGAAGGTGGGGACGACGTCAAATCATCATGCCCTTTATGACTTGGGCTACACACGTGCTACAATGGCAGATACAGAGGGCAGCGAAAGAGTGATCTGAAGCGAAACTCACAAAATCTGTCCCAGTTCGGATTGCACTCTGCAACTCGAGTGCATGAAGTTGGAGTTGCTAGTAATCGCGAATCAGAATGTCGCGGTGAATGCGTTCCCGGGTCTTGTACACACC	350	KF025257.1 Uncultured bacterium 16S	neg	N/A	0	N/A	-350
29CN	Deltocephalini	Paramesodes sp.		phy-part	GTTACAAAGAGTAGCTGAAACGCAAGTTTATAGCCAATCTCATAAAAGCAGTCTCAGTTCGGATTGAAGTCTGCAACTCGACTTCATGAAGTTGGAATCGCTAGTAATCGCGAATCAGCATGTCGCGGTGAATACGTTCTCGGGGTTTGTACACACCGCCCGTCAAACCACGAAAGTTGGTAATACTCGAAAACGATAGCCTAACTTCTTCAGAAGAGGGAATCGTCTAAGGTAGGATCGATGATTGGGGTTAAGTCGTAACAAGGTATCCCTACCGGAAGGTGGGGATGGATCACCTCCTTT	303	MT510167.1 Sugarcane grassy shoot phytoplasma 16S	phy-part	GGGACTCCGCACAAGCGGTGGATCATGTTGTTTAATTCGAAGATACACGAAAAACCTTACCAGGTCTTGACATACTCTGCAAAGCTATAGCAATATAGTGGAGGTTATCAGGGATACAGGTGGTGCATGGTTGTCGTCAGCTCGTGTCGTGAGATGTTAGGTTAAGTCCTAAAACGAGCGCAACCCTTGTCACTAGTTGCCAGCATGTTATGATGGGCACTTTAGTGAGACTGCCAATGAAAAATTGGAGGAAGGTGAGGATCACGTCAAATCATCATGCCCCTTATGATCTGGGCTACAAACGTGATACAATGGCTGTTACAAAGAGTAGCTGAAACGCAAGTTTATAGCCAATCTCATAAAAGCAGTCTCAGTTCGGATTGAAGTCTGCAACTCGAC…	620	KF908793.1 Sugarcane green grassy shoot phytoplasma 16S	317
30MX	Deltocephalini	Sanctanus fasciatus			TACCACCAGTAACTGAGATTAACTTTTTGTTGGTTATGCTTTCCAACTCGCTTTTGGGGGCCCCTTTTACTGGCTCATGGCAGGGGAGGAGGGGGGTTGTCACCCGGAAAACCCCCCGTGGCTACGCCACTGATCGCCTTCAATTAAATTTATGCCAAAATGTTCTACAGCTTGCCTCA	179	N/A	oBa-part	GACGTTTTCAAGGTGCTGCATGGTTGTCGTCAGCTCGTGCCGTGAGGTGTCAGGTTAAGTCCTATAACGAGCGCAACCCCTGTCGTTAGTTGCCAGCTAGTGATGTCGGGAACTCTAACGAGACTGCCAGTGTAAACTGTGAGGAAGGTGGGGATGACGTCAAATCATCACGGCCCTTACGCCTTGGGCCACACACGTGCTACAATGGCCAGTACAGAGAGCAGC	225	MN960084.1 Flavobacterium sp. 16S	46
31PH	Scaphoideini	n. gen. PH1 n. sp. 2		phy-part	TGCACCACCTGTGCAACTGATAACCTCCACTGTGTTTCTACAGCTTTGCAGAAGCATGTCAAGACCTGGTGAGGTTTTTCGGGTACCTTCGAATTAAACAACATGATCCACCGCTTGTGCGGAGTCCCGTCAATTCCTTTAAGTTTCATA	150	ON332726.1 'Echinochloa frumentacea' aster yellows phytoplasma 16S	neg	N/A	0	N/A	-150
32BR	Scaphoideini	Scaphoidula dentata	SRR17212817	oBa-part	AAGACTTGAGAACGTATTCACCGCGGTATGTCTGACCCGCGATTACTAGCAATTCCGGCTTCATGAAGTCGAGTTGCAGACTTCAATCCGAACTGGCGCCGCTTTTCTAACGATTTGCTCCACCTCGCGGTATTGCGTCGTGTTGTAGCG	150	KU655376.1 Uncultured bacterium 16S	oBa-part	GAATAAGTATCGACTAACTCTGTGCCAGCAGTCGCGGTAATACAGAGGATACAAGCGTTATCCGGAGTTATTGGGTTTAAAGGGTGCGTAGGCTGTAGCGGTGAAATGCATAGATATCACACAGAACACCGATAGCGAAAGCAAGTTACTAACCCTATACTGACGCTGAGGCACGAAAGCGTGGGGAGCAAACAGGATTAGATACCCTGGTAGTCCACGCCCTAAACGATGTCAACTGGTTGTTGGGTCTTCACTGACTCAGTAACGAAGCTAACGCGTGAAGTTGACCGCCTGGGGAGTACGGCCGCAAGGTTGAAACTCAAAGGAATTGACGGGGACCCGCACAAGCGGTGGATGATGTGGTTTAATTCGATGCAACGCGAAAAACCTTACCTACCC…	621	HE577681.1 Uncultured bacterium 16S	471
33US	Limotettigini	Limotettix truncatus	SRR17213077	oBa-part	GCTGCATGGTTGTCGTCAGCTCGTGCCGTGAGGTGTAAGGTTAAGTCCCGCAACGAGCGCAACCCTTATGCTTTGTTGCCAGCGATT	87	GU293186.1 Uncultured bacterium 16S	neg	N/A	0	N/A	-87
34AU	Deltocephalini	Horouta aristarche	SRR17213438	oBa-part	ATTTTCTGGTCTAAAACTGACGCTTAAGCACGAAAGCGTGGGGAGCAAAAAGGATTAGATACCCTGGTAGTCCACGCCCTAAACGATGTCAATTGATCA	99	CP038034.1 Achromobacter insolitus 16S	oBa-part	GAGAGTTTGATCCTGGCTCAGGACGAACGCTGGCGGCGTGCTTAACACATGCAAGTCGAACGGAAAGGCCCTGCTTTTGTGGGGTGCTCGAGTGGCGAACGGGTGAGTAACACGTGAGTAACCTGCCCTTGACTTTGGGATAACGTGACGGTAATGGGTAAAGAAGCACCGGCTAACTACGTGCCAGCAGCCGCGGTGATACGTAGGGTGCGAGCGTTGTCCGGATTTATTGGGCGTAAAGGGCTCGTAGGTAATCAATCTTAGTTCGGATTGTACTCTGCAACTCGAGTACATGAAGCTGGAATCGCTAGTAATCGCGGATCAGCATGCCGCGGTGAATATGTAAACTGGTCTTGTACACACCGCCCGTCACACCATGGAAATAGATTTTATTCTAAA	399	AP022845.1 Cutibacterium acnes 16S	300
35BR	Deltocephalini	Amplicephalus maculellus		neg	N/A	0	N/A	neg	N/A	0	N/A	0
